# Supplementary material for: A heterogeneous interface on NiS@Ni3S2/NiMoO4 heterostructures for efficient urea electrolysis
Source: Royal Society of Chemistry journal article supplement (doi:10.1039/d0ta04944a), 2020-01-01
Supplement: d0ta04944a1.pdf [file d0ta04944a1.pdf]

**Supplementary Information for**  
**Heterogeneous Interface on NiS@Ni<sub>3</sub>S<sub>2</sub>/NiMoO<sub>4</sub> Heterostructures for Efficient**  
**Urea Electrolysis**

Linna Sha,<sup>a,+</sup> Tianfu Liu,<sup>b,+</sup> Ke Ye,<sup>a,\*</sup> Kai Zhu,<sup>a</sup> Jun Yan,<sup>a</sup> Jinling Yin,<sup>a</sup> Guiling Wang,<sup>a</sup>  
Dianxue Cao<sup>a,\*</sup>

<sup>a</sup> Key Laboratory of Superlight Materials and Surface Technology of Ministry of Education, College of Materials Science and Chemical Engineering, Harbin Engineering University, Harbin, 150001, China.

<sup>b</sup> State Key Laboratory of Catalysis, Dalian National Laboratory for Clean Energy, Dalian Institute of Chemical Physics, Chinese Academy of Sciences, Dalian 116023, China.

---

<sup>+</sup> These authors contributed equally to this work.

<sup>\*</sup>Corresponding authors.

E-mail addresses: yeke@hrbeu.edu.cn (K. Ye); caodianxue@hrbeu.edu.cn (D. Cao)

## **Experimental**

*Synthesis of NiS@Ni<sub>3</sub>S<sub>2</sub> nanorod arrays framework.* In a typical synthesis, 5 mmol sulfur powder was dispersed in 16 mL C<sub>2</sub>H<sub>8</sub>N<sub>2</sub> with homogenously stirred for 10 min, and then 16 mL ethanol was added to the above solution and rapid stirring for 10 min. Next, the mixture was transferred into a 50 mL Teflon-lined stainless autoclave containing the precleaned Ni foam (2.0 cm×3.0 cm). After hydrothermal treating at 160 °C for 24 h, the products were collected and then cleaned by deionized water and ethanol several times before they were dried under vacuum at 60 °C for overnight.

*Synthesis of NiS@Ni<sub>3</sub>S<sub>2</sub>/NiMoO<sub>4</sub> composite.* First, 0.01 g sodium molybdate and 0.014 g nickel nitrate were dispersed into 50 mL of 50 wt% aqueous ethanol solution. Subsequently, the as-obtained NiS@Ni<sub>3</sub>S<sub>2</sub> was immersed in the solution and reacted in a 50 mL Teflon-lined autoclave at 130 °C for 12 h. After cooled down to room temperature, the Ni foam with prepared precursors were transferred to muffle furnace and annealed at 400 °C for 2 h in air atmosphere to obtain the NiS@Ni<sub>3</sub>S<sub>2</sub>/NiMoO<sub>4</sub> composite.

For comparison, NiMoO<sub>4</sub> grown on Ni foam were obtained in the similarly procedure by replacing NiS@Ni<sub>3</sub>S<sub>2</sub> with pure Ni foam.

## **Material Characterizations**

The crystal configuration of the samples was identified by X-ray diffractometer (Rigaku TTR III) with a Cu<sub>Kα</sub> radiation ( $\lambda=1.5418$  nm). The scanning electron microscope (SEM) with energy dispersive X-ray spectroscopy (EDX) were taken with JEOL JSM-6480 system. Transmission electron microscopy (TEM) and high resolution

TEM (HRTEM) images were collected on a JEOL-2100F TEM at an acceleration voltage of 200 kV. X-ray photoelectron spectroscopy (XPS) measurements were carried out using the surface analysis system (Thermofisher Escalab Xi<sup>+</sup>) with a monochromatic Al<sub>Kα</sub> X-ray source (hν=1486.6 eV).

### **Electrochemical Measurements**

Electrochemical measurements were carried out in an electrochemical workstation (Autolab PGSTAT 302) with a typical three-electrode system, in which the resultant catalyst with a dimensions of 1.0 cm×1.0 cm was directly served as the working electrode, The carbon rod and Ag/AgCl electrode were used as the working electrode, counter electrode and reference electrode, respectively. After weighed the active materials loads per unit area, the mass loading of NiS@Ni<sub>3</sub>S<sub>2</sub>, NiMoO<sub>4</sub>/NF and NiS@Ni<sub>3</sub>S<sub>2</sub>/NiMoO<sub>4</sub> catalysts are 0.0312 g, 0.0326 g and 0.0326 g, respectively. All linear sweep voltammetry (LSV) were carried out with a scan rate of 2 mV s<sup>-1</sup>. All measured potentials were calibrated to reversible hydrogen electrode (RHE) according to the following equation:  $E_{\text{RHE}}=E_{\text{Ag/AgCl}} + 0.197 + 0.059 \times \text{pH}$ . The measured UOR polarization curves were capacity corrected by taking an average of forward and backward scans. The electrochemically active surface areas (ECSA) were estimated by a series of cyclic voltammetry measurements performed with various scan rates (20~100 mV s<sup>-1</sup>) in a non-Faradaic region. By plotting the difference of current density ( $\Delta J$ ) between the anodic and cathodic sweeps ( $J_{\text{anodic}}-J_{\text{cathodic}}$ ) under intermediate potential against the scan rate, a linear trend was observed. The slope of the fitting line is equal to twice the geometric double layer capacitance ( $C_{\text{dl}}$ ), which is proportional to

the ECSA of the catalyst. Therefore, we can compare the electrochemical surface areas of different samples based on their  $C_{dl}$  values. Electrochemical impedance spectra (EIS) were collected at a frequency between 100 kHz and 0.01 kHz. In water splitting tests, all results were revised by ohmic potentials drop ( $iR$ ) correction. The electrolyte for HER, OER and water electrolysis measurements was 1 M KOH, whereas the UOR and urea electrolysis performance were evaluated in 1 M KOH with 0.5 M urea. The stability measurements were recorded by chronopotentiometry measurements.

### **Calculations**

The simulated model in this work consists of a slab of NiS ( $Ni_{36}S_{36}$ ), and  $NiMoO_4$  ( $Ni_8Mo_8O_{32}$ ). The calculations presented here were performed using the periodic, spin-polarized DFT as implemented in the Vienna ab initio simulation package (VASP).<sup>[1]</sup> The electron-ion interactions were described by the projector augmented wave (PAW) method proposed by Blochl<sup>[2]</sup> and implemented by Kresse.<sup>[3]</sup> The RPBE functional was used as an exchange-correlation functional approximation<sup>[4]</sup> and a plane wave basis set with an energy cutoff of 400 eV was used. Only gamma point was used for the Brillouin zone sampling.

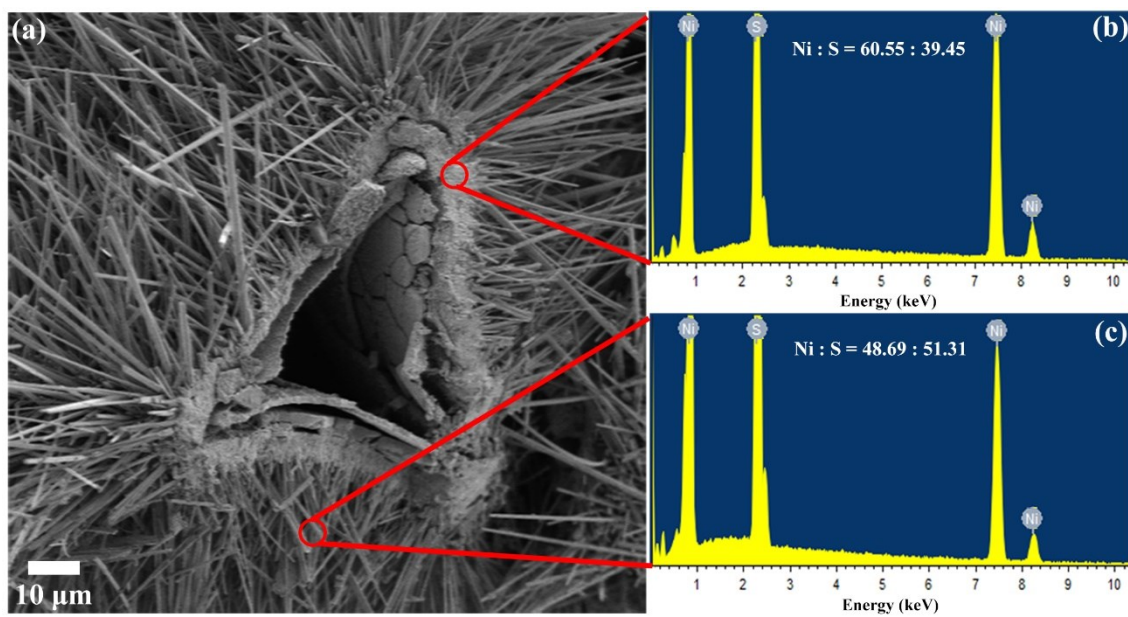

**Figure S1.** (a) Cross-sectional SEM image and the EDX spectra of the (b) internal framework and (c) external nanorods of the NiS@Ni<sub>3</sub>S<sub>2</sub> sample.

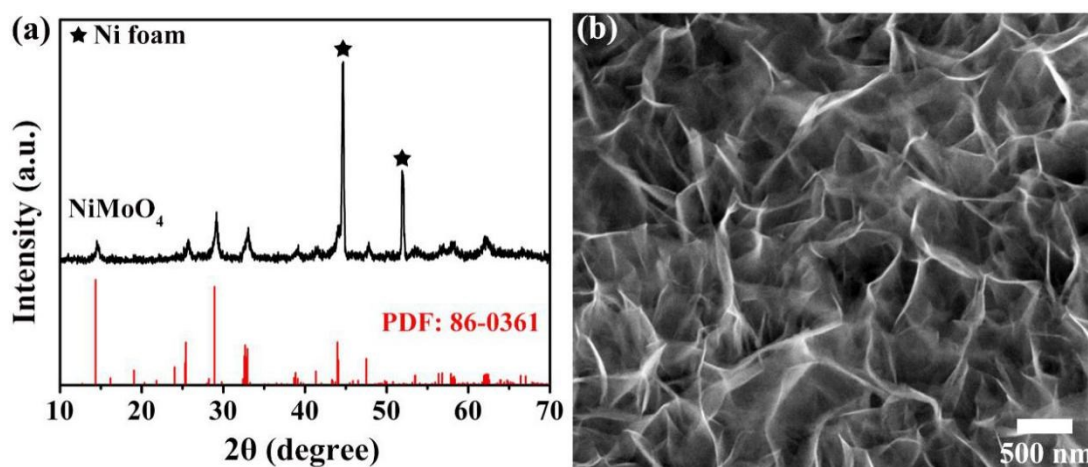

**Figure S2.** (a) XRD pattern and (b) SEM image of NiMoO<sub>4</sub> nanosheets grown on the Ni foam.

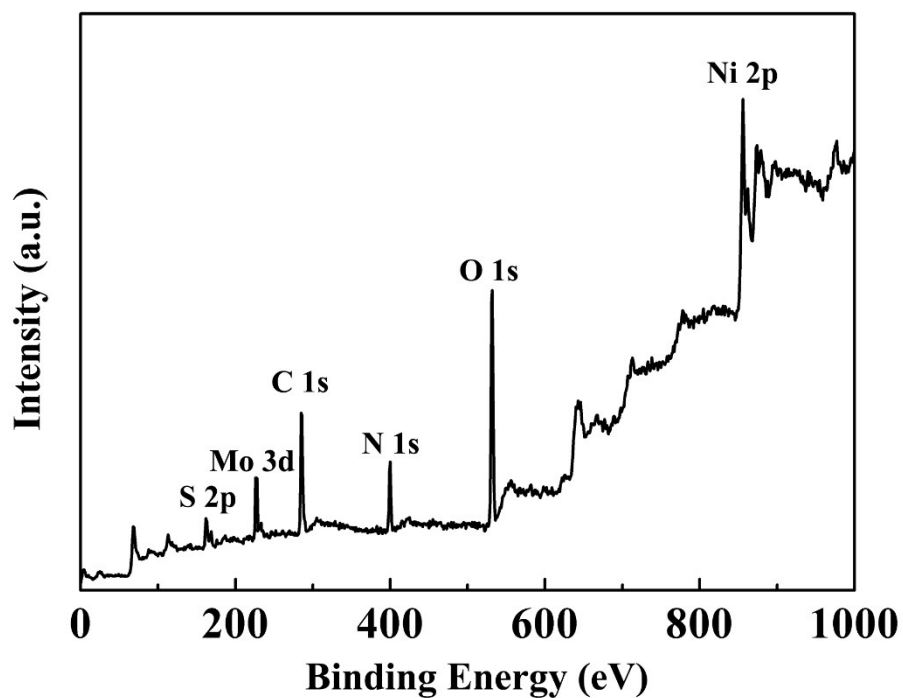

**Figure S3.** Full XPS survey spectrum of NiS@Ni<sub>3</sub>S<sub>2</sub>/NiMoO<sub>4</sub>.

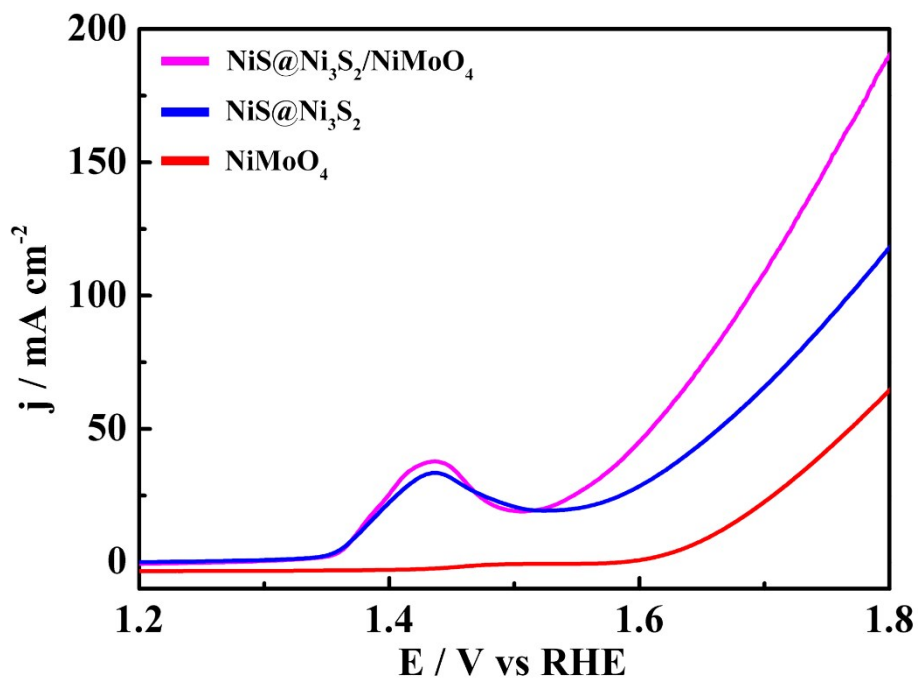

**Figure S4.** OER polarization curves of NiMoO<sub>4</sub>, NiS@Ni<sub>3</sub>S<sub>2</sub> and NiS@Ni<sub>3</sub>S<sub>2</sub>/NiMoO<sub>4</sub>

in 1.0 M KOH.

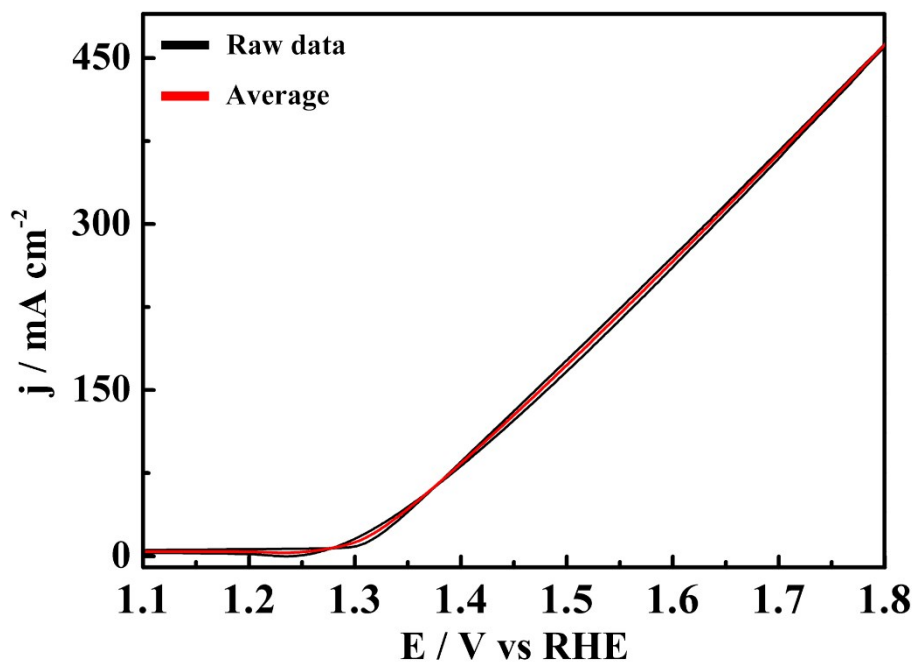

**Figure S5.** Cyclic voltammetry (CV) curve (black) and corresponding average activity calculated from the CV curve (red) of NiS@Ni<sub>3</sub>S<sub>2</sub>/NiMoO<sub>4</sub> electrode. Scan rate: 2 mV s<sup>-1</sup>.

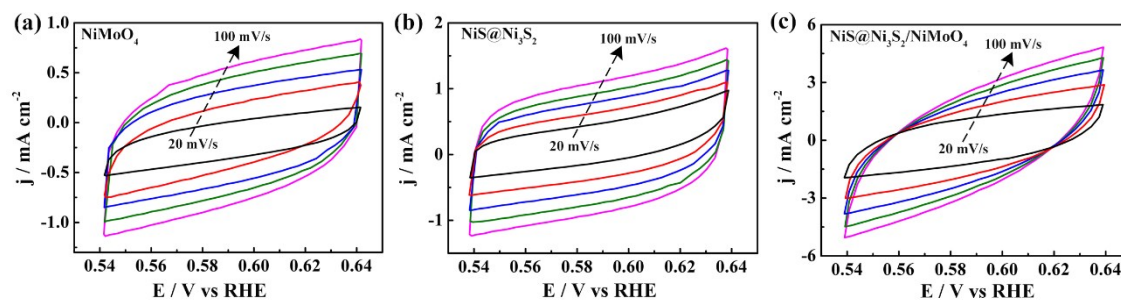

**Figure S6.** Cyclic voltammetry curves for (a) NiMoO<sub>4</sub>, (b) NiS@Ni<sub>3</sub>S<sub>2</sub> and (c) NiS@Ni<sub>3</sub>S<sub>2</sub>/NiMoO<sub>4</sub> electrodes in the region of 0.54~0.64 V vs. RHE with different scan rates upon UOR catalysis.

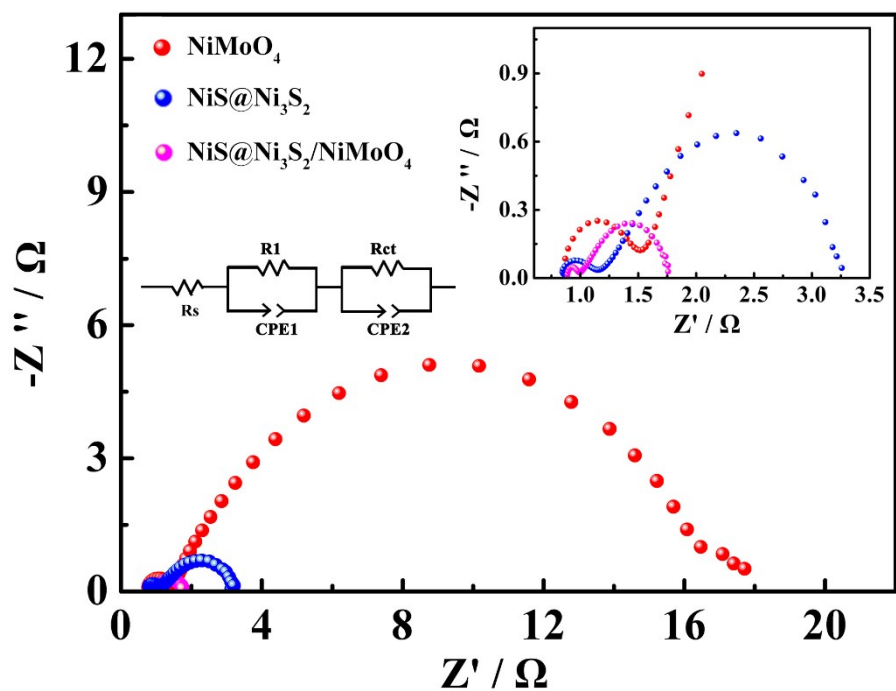

**Figure S7.** Nyquist plots of NiMoO<sub>4</sub>, NiS@Ni<sub>3</sub>S<sub>2</sub> and NiS@Ni<sub>3</sub>S<sub>2</sub>/NiMoO<sub>4</sub> catalysts for UOR process at 1.35 V vs. RHE.

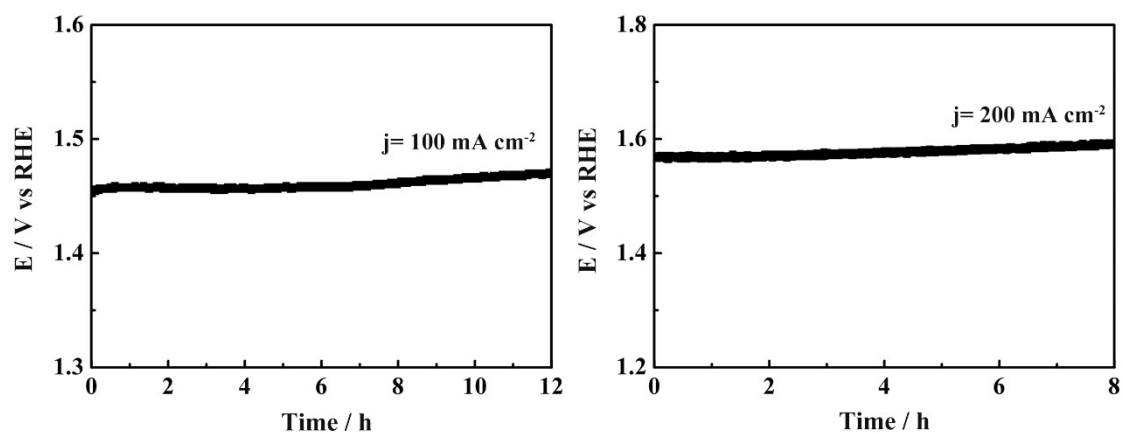

**Figure S8.** Long-time stability test of NiS@Ni<sub>3</sub>S<sub>2</sub>/NiMoO<sub>4</sub> at (a) 100 and (b) 200 mA cm<sup>-2</sup> for 12 and 8 h, respectively.



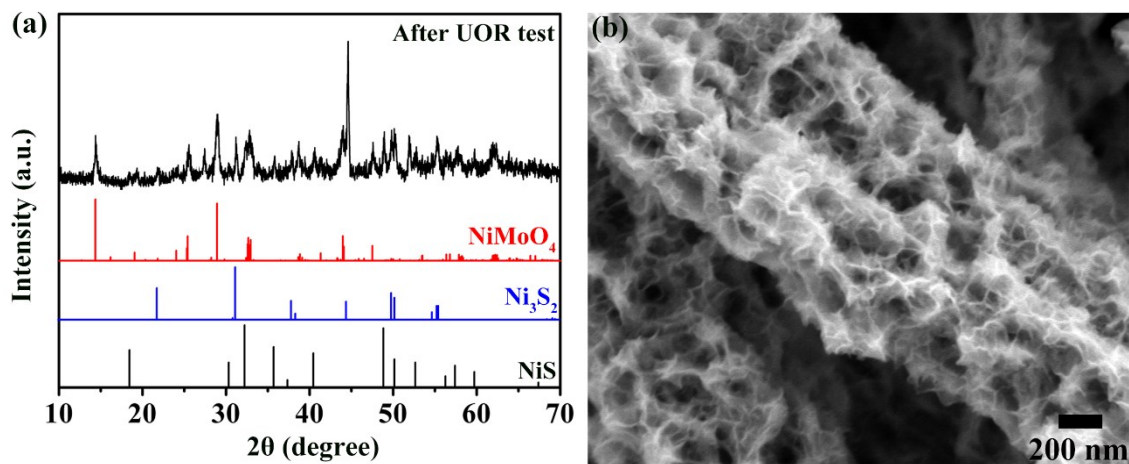

**Figure S9.** (a) XRD pattern and (b) SEM image of NiS@Ni<sub>3</sub>S<sub>2</sub>/NiMoO<sub>4</sub> after UOR test.

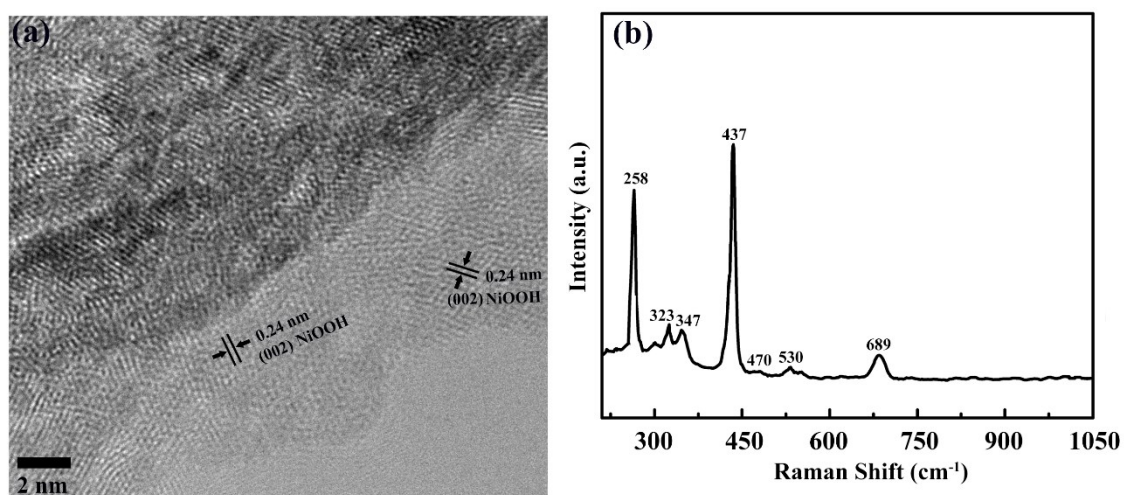

**Figure S10.** (a) HRTEM image and (b) Raman spectrum of NiS@Ni<sub>3</sub>S<sub>2</sub>/NiMoO<sub>4</sub> after UOR test.

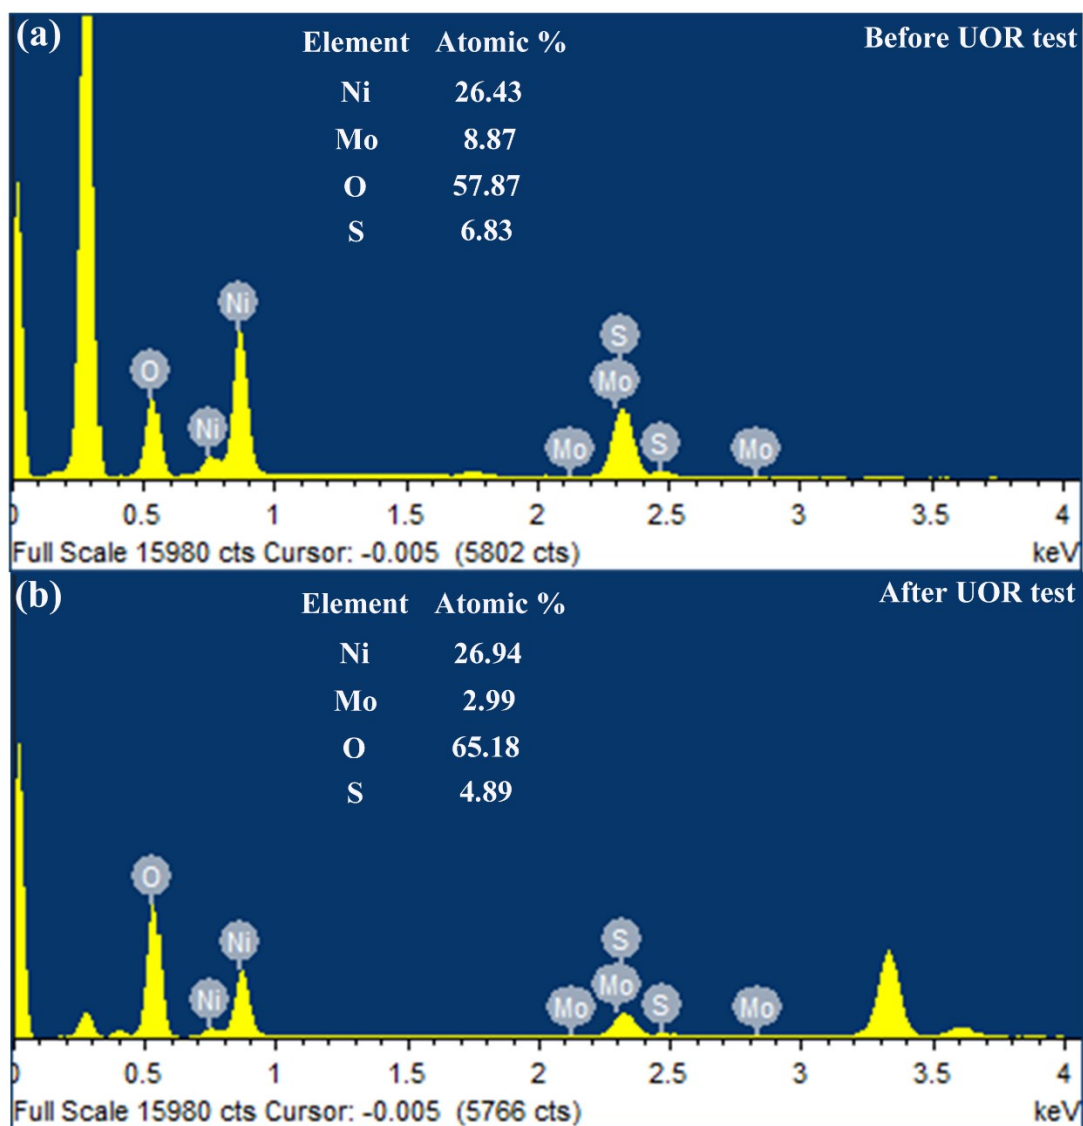

**Figure S11.** EDX spectra of NiS@Ni<sub>3</sub>S<sub>2</sub>/NiMoO<sub>4</sub> catalyst (a) before and (b) after UOR test.

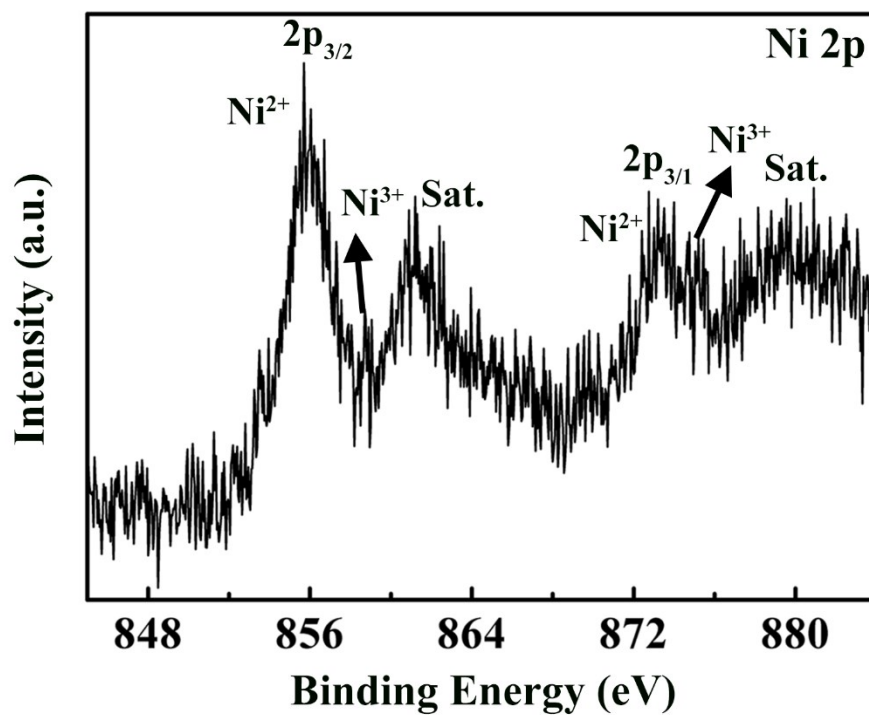

**Figure S12.** High resolution Ni 2p spectrum of NiS@Ni<sub>3</sub>S<sub>2</sub>/NiMoO<sub>4</sub> after UOR test.

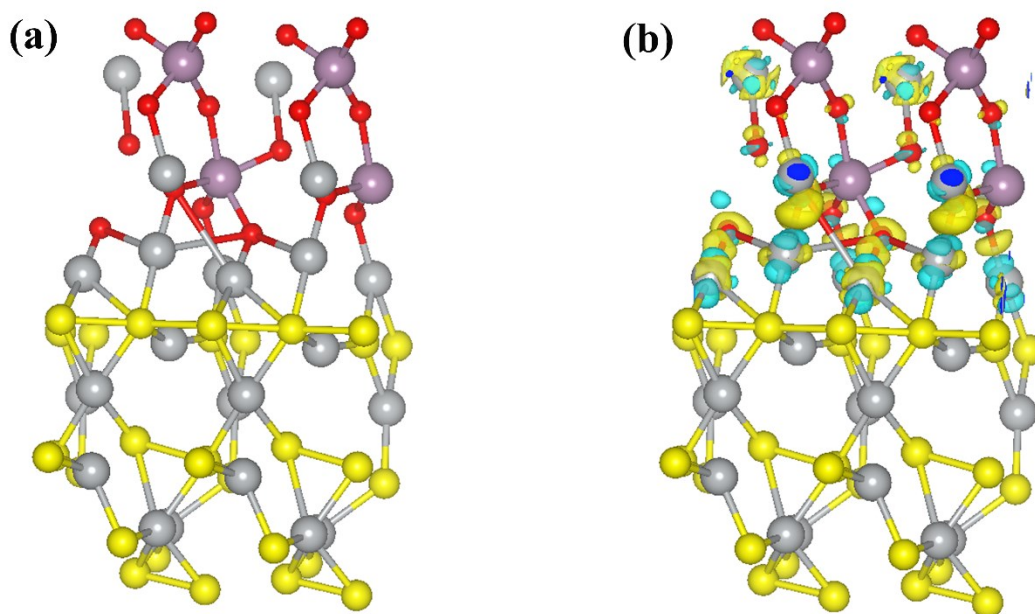

**Figure S13.** (a) The heterojunction structure of NiS/NiMoO<sub>4</sub> with (010) facet. The gray, red, yellow, purple spheres represent nickel, oxygen, sulfur, and molybdenum atoms, respectively. (b) The charge density difference in the heterostructure of NiS and NiMoO<sub>4</sub>. The yellow and blue isosurfaces represent charge accumulation and charge depletion in space, respectively.

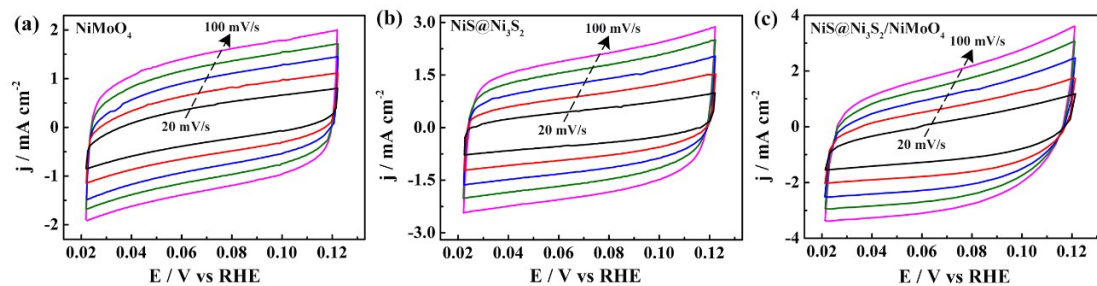

**Figure S14.** Cyclic voltammetry curves for (a)  $\text{NiMoO}_4$ , (b)  $\text{NiS@Ni}_3\text{S}_2$  and (c)  $\text{NiS@Ni}_3\text{S}_2/\text{NiMoO}_4$  electrodes in the region of 0.02~0.12 V vs. RHE with different scanning rates upon HER catalysis.

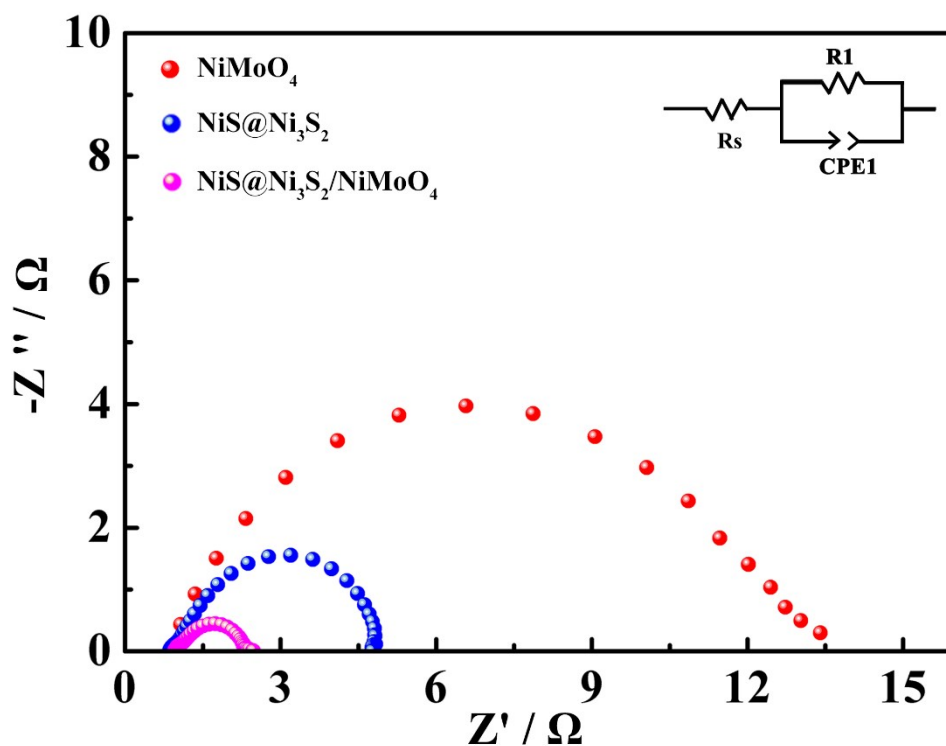

**Figure S15.** Nyquist plots of  $\text{NiMoO}_4$ ,  $\text{NiS@Ni}_3\text{S}_2$  and  $\text{NiS@Ni}_3\text{S}_2/\text{NiMoO}_4$  catalysts for HER process at an overpotential of  $-200$  mV.

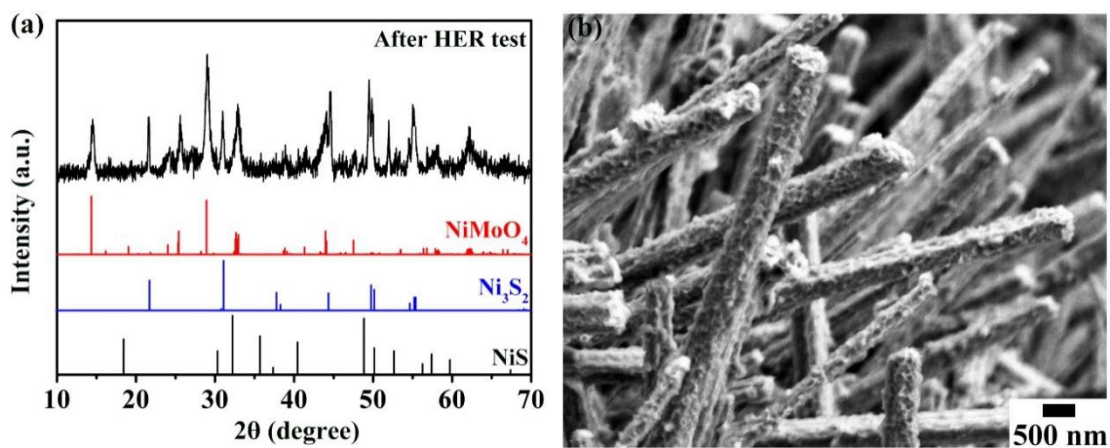

**Figure S16.** (a) XRD pattern and (b) SEM image of NiS@Ni<sub>3</sub>S<sub>2</sub>/NiMoO<sub>4</sub> after HER test.

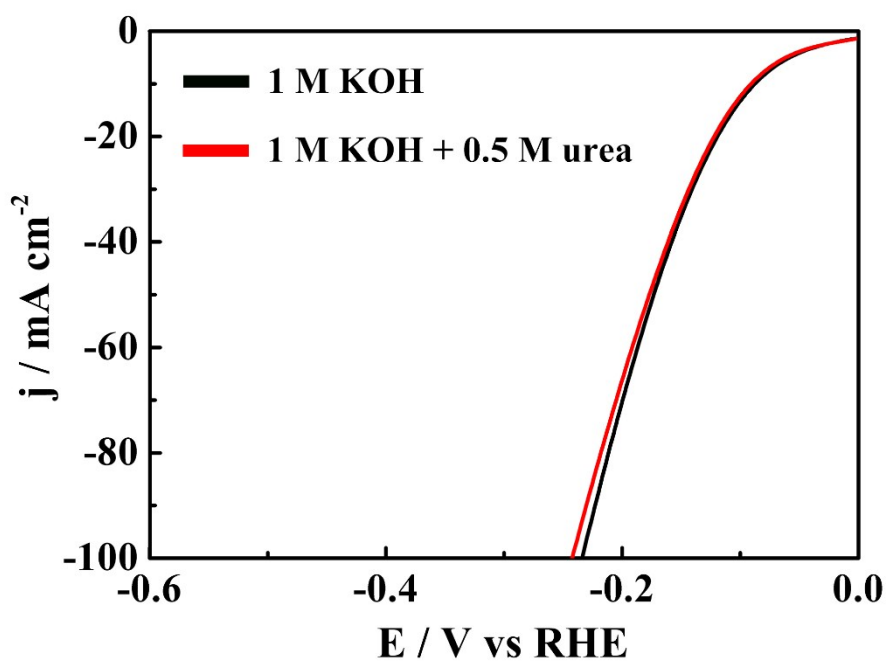

**Figure S17.** HER polarization plots of NiS@Ni<sub>3</sub>S<sub>2</sub>/NiMoO<sub>4</sub> in 1 M KOH with and without 0.5 M urea.

**Table S1.** Comparison of the UOR performance of NiS@Ni<sub>3</sub>S<sub>2</sub>/NiMoO<sub>4</sub> with other reported non-precious electrocatalysts in 1 M KOH electrolyte.

| Catalysts                                                | Urea concentrate (M) | j (mA cm <sup>-2</sup> ) | Voltage (V vs RHE) | Tafel slope (mV dec <sup>-1</sup> ) | References       |
|----------------------------------------------------------|----------------------|--------------------------|--------------------|-------------------------------------|------------------|
| NF/NiMoO <sub>4</sub>                                    | 0.5                  | 10                       | 1.37               | 19                                  | [5]              |
| Ni <sub>3</sub> N/NF                                     | 0.5                  | 10                       | 1.34               | 41                                  | [6]              |
| MoS <sub>4</sub> -LDH/NF                                 | 0.33                 | 10                       | 1.34               | 29                                  | [7]              |
| MnO <sub>2</sub> /MnCo <sub>2</sub> O <sub>4</sub> /Ni   | 0.5                  | 10                       | 1.33               | 72                                  | [8]              |
| Ni <sub>2</sub> P/NF                                     | 0.5                  | 10                       | 1.37               | 49                                  | [9]              |
| NF/MnO <sub>2</sub>                                      | 0.5                  | 10                       | 1.33               | 75                                  | [10]             |
| Ni-Mo alloy                                              | 0.1                  | 10                       | 1.36               | 22                                  | [11]             |
| NiMoS/Ti                                                 | 0.5                  | 10                       | 1.34               | 19                                  | [12]             |
| <b>NiS@Ni<sub>3</sub>S<sub>2</sub>/NiMoO<sub>4</sub></b> | <b>0.5</b>           | <b>10</b>                | <b>1.30</b>        | <b>30</b>                           | <b>This work</b> |

4

**Table S2.** Comparison of the HER performance of NiS@Ni<sub>3</sub>S<sub>2</sub>/NiMoO<sub>4</sub> with other reported electrocatalysts in 1 M KOH electrolyte.

| Catalysts                                                        | j<br>(mA cm <sup>-2</sup> ) | η <sub>j</sub> (mV) | Tafel slope<br>(mV dec <sup>-1</sup> ) | References       |
|------------------------------------------------------------------|-----------------------------|---------------------|----------------------------------------|------------------|
| MoSe <sub>2</sub> /SnO <sub>2</sub>                              | 10                          | 174                 | 51                                     | [13]             |
| Ni <sub>3</sub> S <sub>2</sub> /NiS/NOSC                         | 10                          | 180                 | 83                                     | [14]             |
| Ni <sub>0.89</sub> Co <sub>0.11</sub> Se <sub>2</sub><br>MNSN/NF | 10                          | 85                  | 52                                     | [15]             |
| MoS <sub>2</sub> -Ni <sub>3</sub> S <sub>2</sub>                 | 10                          | 110                 | 83                                     | [16]             |
| S-MoSe <sub>2</sub>                                              | 10                          | 100                 | 60                                     | [17]             |
| Co <sub>3</sub> S <sub>4</sub> @MoS <sub>2</sub>                 | 10                          | 136                 | 74                                     | [18]             |
| CF@NPC-MoP                                                       | 10                          | 53                  | 55.6                                   | [19]             |
| Co <sub>3</sub> S <sub>4</sub> /EC-MOF                           | 10                          | 84                  | 82                                     | [20]             |
| N-MoSe <sub>2</sub> /TiC-C                                       | 10                          | 106                 | 32                                     | [21]             |
| <b>NiS@Ni<sub>3</sub>S<sub>2</sub>/NiMoO<sub>4</sub></b>         | <b>10</b>                   | <b>80</b>           | <b>75</b>                              | <b>This work</b> |



**Table S3.** Comparison of the urea electrolysis efficiency of NiS@Ni<sub>3</sub>S<sub>2</sub>/NiMoO<sub>4</sub> with other reported bifunctional electrocatalysts.

| Catalysts                                               | Electrolyte           | Cell voltage (V) | j (mA cm <sup>-2</sup> ) | References |
|---------------------------------------------------------|-----------------------|------------------|--------------------------|------------|
| NiMoS/CC                                                | 1.0 M KOH+0.5 M urea  | 1.59             | 10                       | [12]       |
| Ni <sub>3</sub> N/CC                                    | 1.0 M KOH+0.33 M urea | 1.44             | 10                       | [22]       |
| MnO <sub>2</sub> /MnCo <sub>2</sub> O <sub>4</sub> /NF  | 1.0 M KOH+0.5 M urea  | 1.55             | 10                       | [8]        |
| CoS <sub>2</sub> /Ti                                    | 1.0 M KOH+0.3 M urea  | 1.59             | 10                       | [23]       |
| Fe <sub>11.1%</sub> -Ni <sub>3</sub> S <sub>2</sub> /NF | 1.0 M KOH+0.33 M urea | 1.46             | 10                       | [24]       |
| Ni-Mo alloy                                             | 1.0 M KOH+0.1 M urea  | 1.43             | 10                       | [11]       |
| 1% Cu:aNi(OH) <sub>2</sub> /NF                          | 1.0 M KOH+0.33 M urea | 1.49             | 10                       | [25]       |
| NiFeCo LDH/NF                                           | 1.0 M KOH+0.33 M urea | 1.49             | 10                       | [26]       |
| Ni <sub>2</sub> P/Fe <sub>2</sub> P                     | 1.0 M KOH+0.5 M urea  | 1.47             | 10                       | [27]       |
| NiS@Ni <sub>3</sub> S <sub>2</sub> /NiMoO <sub>4</sub>  | 1.0 M KOH+0.5 M urea  | 1.40             | 10                       | This work  |

## References

- [1] G. Kresse and J. Furthmüller, *Phys. Rev. B*, 1996, **54**, 11169-11186.
- [2] G. Kresse and J. Furthmüller, *Comp. Mater. Sci.*, 1996, **6**, 15-50.
- [3] P. E. Blöchl and Matter, *Phys. Rev. B*, 1994, **50**, 17953-17979.
- [4] B. Hammer, L. B. Hansen and J. K. Nørskov, *Phys. Rev. B*, 1999, **59**, 7413-7421.
- [5] Z. Y. Yu, C. C. Lang, M. R. Gao, Y. Chen, Q. Q. Fu, Y. Duan and S. H. Yu, *Energy Environ. Sci.*, 2018, **11**, 1890-1897.
- [6] S. Hu, C. Feng, S. Wang, J. Liu, H. Wu, L. Zhang and J. Zhang, *ACS Appl. Mater. Interfaces*, 2019, **11**, 13168-13175.
- [7] A. Nadeema, V. Kashyap, R. Gururaj and S. Kurungot, *ACS Appl. Mater. Interfaces*, 2019, **11**, 25917-25927.
- [8] C. Xiao, S. Li, X. Zhang and D. R. MacFarlane, *J. Mater. Chem. A*, 2017, **5**, 7825-7832.
- [9] D. Liu, T. Liu, L. Zhang, F. Qu, G. Du, A. M. Asiri and X. Sun, *J. Mater. Chem. A*, 2017, **5**, 3208-3213.
- [10] S. Chen, J. Duan, A. Vasileff and S. Z. Qiao, *Angew. Chem. Int. Ed.*, 2016, **55**, 3804-3808.
- [11] J. Y. Zhang, T. He, M. Wang, R. Qi, Y. Yan, Z. Dong, H. Liu, H. Wang and B. Y. Xia, *Nano Energy*, 2019, **60**, 894-902.
- [12] X. Wang, J. Wang, X. Sun, S. Wei, L. Cui, W. Yang and J. Liu, *Nano Res.*, 2018, **11**, 988-996.
- [13] Y. Huang, Y. E. Miao, J. Fu, S. Mo, C. Wei and T. Liu, *J. Mater. Chem. A*, 2015,

3, 16263-16271.

[14] Y. Cao, Y. Meng, S. Huang, S. He, X. Li, S. Tong and M. Wu, *ACS Sustain. Chem. Eng.*, 2018, **6**, 15582-15590.

[15] B. Liu, Y. F. Zhao, H. Q. Peng, Z. Y. Zhang, C. K. Sit, M. F. Yuen, T. R. Zhang, C. S. Lee and W. J. Zhang, *Adv. Mater.*, 2017, **29**, 1606521.

[16] J. Zhang, T. Wang, D. Pohl, B. Rellinghaus and R. J. Dong, *Angew. Chem. Int. Ed.*, 2016, **55**, 6702-6707.

[17] C. Xu, S. J. Peng, C. L. Tan, H. X. Ang, H. T. Tan, H. Zhang and Q. Y. Yan, *J. Mater. Chem. A*, 2014, **2**, 5597-5601.

[18] Y. Guo, J. Tang, Z. Wang, Y. M. Kang, Y. Bando and Y. Yamauchi, *Nano Energy*, 2018, **47**, 494-502.

[19] J. Xiao, Z. Zhang, Y. Zhang, Q. Lv, F. Jing, K. Chi and S. Wang, *Nano Energy*, 2018, **51**, 223-230.

[20] T. Liu, P. Li, N. Yao, T. Kong, G. Cheng, S. Chen and W. J. Luo, *Adv. Mater.*, 2019, **31**, 1806672.

[21] S. Deng, Y. Fan, Q. H. Zhang and Z. Yu, *Adv. Mater.*, 2018, **30**, 1802223.

[22] Q. Liu, L. Xie, F. Qu, Z. Liu, G. Du, A. M. Asiri and X. Sun, *Inorg. Chem. Front.*, 2017, **4**, 1120-1124.

[23] S. Wei, X. Wang, J. Wang, X. Sun, L. Cui, W. Yang, Y. Zheng and J. Liu, *Electrochim. Acta*, 2017, **246**, 776-782.

[24] W. Zhu, Z. Yue, W. Zhang, N. Hu, Z. Luo, M. Ren, Z. Xu, Z. Wei, Y. Suo and J. Wang, *J. Mater. Chem. A*, 2018, **6**, 4346-4353.

- [25] J. Xie, L. Gao, S. Cao, W. Liu, F. Lei, P. Hao, X. Xia and B. Tang, *J. Mater. Chem. A*, 2019, **7**, 13577-13584.
- [26] P. Babar, A. Lokhande, V. Karade, B. Pawar, M. G. Gang, S. Pawar and J. H. Kim, *ACS Sustain. Chem. Eng.*, 2019, **7**, 10035-10043.
- [27] L. Yan, Y. Sun, E. Hu, J. Ning, Y. Zhong, Z. Zhang and Y. Hu, *J. Colloid Interf. Sci.*, 2019, **541**, 279-286.
